# Supplementary material
Source: MDPI journal article supplement (https://www.mdpi.com/2504-5377/6/3/46)
Supplement: s1 [file s1]

# Supporting Information

## *Nucleation, Coalescence, and Thin Film Growth of Triflate-Based Ionic Liquids on ITO, Ag, and Au Surfaces*

Mariana S. M. Teixeira, Luís M. N. B. F. Santos, and José C. S. Costa\*

CIQUP, Institute of Molecular Sciences (IMS), Department of Chemistry and Biochemistry, Faculty of Science, University of Porto, Rua do Campo Alegre, P4169 007 Porto, Portugal

\*E-mail: [jose.costa@fc.up.pt](mailto:jose.costa@fc.up.pt)

## Index

|                                                                                                                                                                                                                                                                                         |            |
|-----------------------------------------------------------------------------------------------------------------------------------------------------------------------------------------------------------------------------------------------------------------------------------------|------------|
| <b>Figure S1.</b> Schematic representation of the vapor deposition/vacuum thermal evaporation methodology.                                                                                                                                                                              | <b>S3</b>  |
| <b>Figure S2.</b> Schematic representation of the ovens of the ThinFilmVD apparatus.                                                                                                                                                                                                    | <b>S3</b>  |
| <b>Figure S3.</b> Schematic representation and images of the substrate support system.                                                                                                                                                                                                  | <b>S4</b>  |
| <b>Figure S4.</b> Illustration of the mechanisms of nucleation and growth of ionic liquid films.                                                                                                                                                                                        | <b>S4</b>  |
| <b>Figure S5.</b> Morphology of the substrates (ITO/glass, Ag/ITO/glass, and Au/ITO/glass).                                                                                                                                                                                             | <b>S5</b>  |
| <b>Figure S6.</b> Micrographs acquired through high-resolution scanning electron microscopy of vapor-deposited [C <sub>2</sub> C <sub>1</sub> im][OTF] onto surfaces of indium tin oxide (ITO)/, silver (Ag)/ITO, and gold(Au)/ITO.                                                     | <b>S6</b>  |
| <b>Figure S7.</b> Micrographs acquired through high-resolution scanning electron microscopy of vapor-deposited [C <sub>4</sub> C <sub>1</sub> im][OTF] onto surfaces of indium tin oxide (ITO)/, silver (Ag)/ITO, and gold(Au)/ITO.                                                     | <b>S7</b>  |
| <b>Figure S8.</b> Micrographs acquired through high-resolution scanning electron microscopy of vapor-deposited [C <sub>6</sub> C <sub>1</sub> im][OTF] onto surfaces of indium tin oxide (ITO)/, silver (Ag)/ITO, and gold(Au)/ITO.                                                     | <b>S8</b>  |
| <b>Figure S9.</b> Micrographs acquired through high-resolution scanning electron microscopy of vapor-deposited [C <sub>8</sub> C <sub>1</sub> im][OTF] onto surfaces of indium tin oxide (ITO)/, silver (Ag)/ITO, and gold(Au)/ITO.                                                     | <b>S9</b>  |
| <b>Figure S10.</b> Micrographs acquired through high-resolution scanning electron microscopy of vapor-deposited [C <sub>10</sub> C <sub>1</sub> im][OTF] onto surfaces of indium tin oxide (ITO)/, silver (Ag)/ITO, and gold(Au)/ITO.                                                   | <b>S10</b> |
| <b>Figure S11.</b> Droplet size distribution of vapor-deposited ionic liquids onto ITO/glass and Ag/ITO/glass surfaces.                                                                                                                                                                 | <b>S11</b> |
| <b>Figure S12.</b> Schematic representation of the number of ionic liquid microdroplets formed per mm <sup>2</sup> of surface area and the respective surface coverage of those microdroplets as a function of each ionic liquid in the [C <sub>n</sub> C <sub>1</sub> im][OTF] series. | <b>S12</b> |
| <b>Table S1.</b> Experimental conditions for the physical vapor deposition of each ionic liquid.                                                                                                                                                                                        | <b>S13</b> |

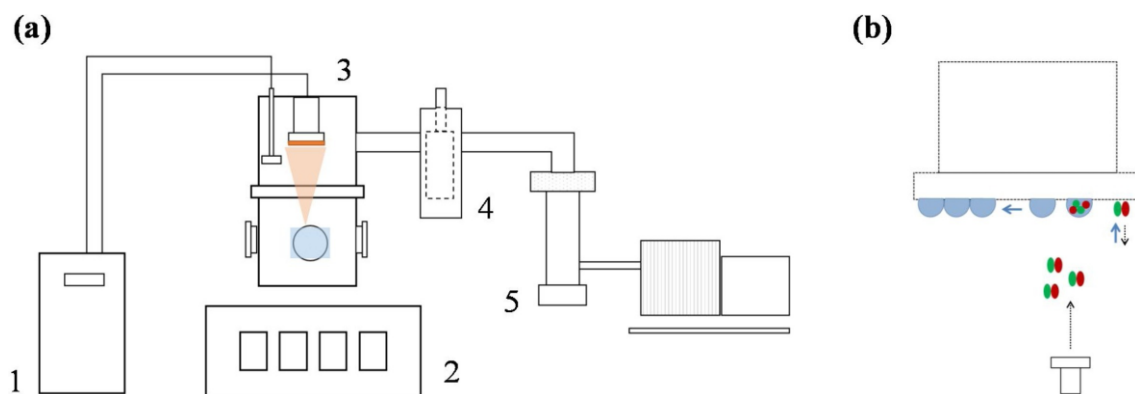

**Figure S1.** Schematic representation of the vapor deposition/vacuum thermal evaporation methodology: (a) ThinFilmVD apparatus (1 – cooling system, 2 – instrumentation box, 3 – vacuum chamber, 4 –  $\text{N}_2(\text{l})$  metallic trap, 5 – vacuum pumping system); (b) schematic detail of the PVD of ionic liquids by vacuum thermal evaporation from a Knudsen cell. More details: *Appl. Surf. Sci.*, 2018, 428, 242 and *J. Chem. Eng. Data*, 2015, 60, 3776.

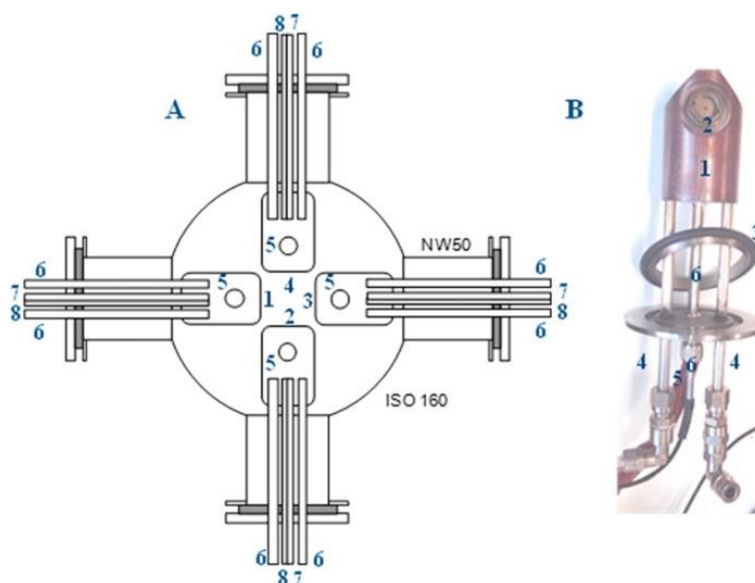

**Figure S2.** A – Schematic representation of the ovens of the ThinFilmVD apparatus: 1, 2, 3, 4 – individual copper ovens; 5 – cavity of the Knudsen cell screwing; 6 – air cooling tube; 7 – heater; 8 – Pt100 sensor; B – Image of an individual oven (top view): 1 – copper block; 2 – Knudsen cell; 3 – Viton O-ring; 4 – cooling system; 5 – heater; 6 – Pt100. More details: *J. Chem. Eng. Data*, 2015, 60, 3776.

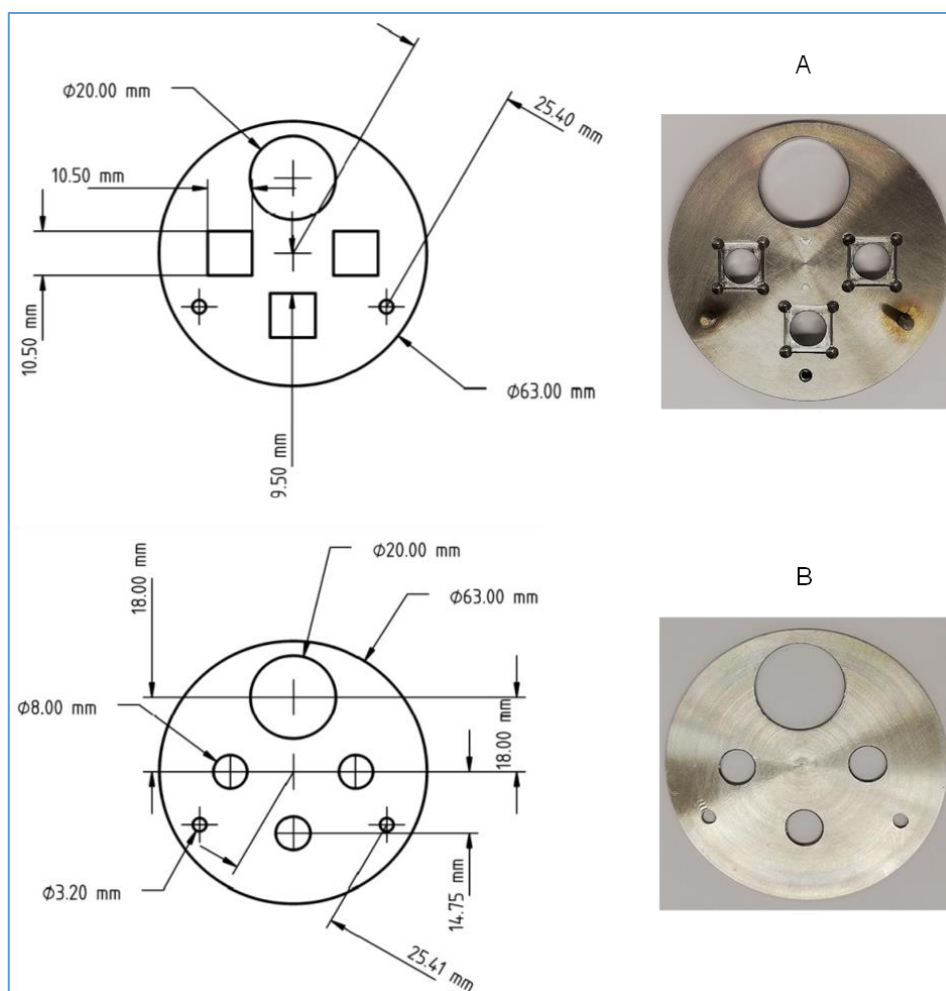

**Figure S3.** Schematic representation (left) and images (right) of the substrate support system. The support was used for the simultaneous deposition of each ionic liquid on three different surfaces: ITO/glass; Ag/ITO/glass; Au/ITO/glass.

## PVD of Ionic Liquids

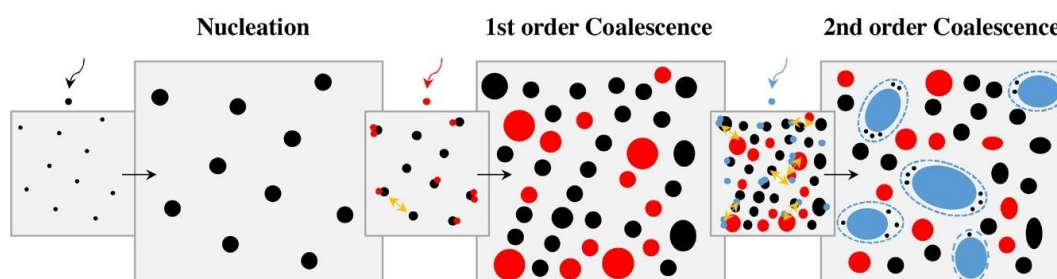

**Figure S4.** Illustration of the mechanisms of nucleation and growth of ionic liquid films: minimum free area to promote nucleation (MFAN); first-order coalescence; second-order coalescence. More details: *Appl. Surf. Sci.*, 2018, 428, 242.

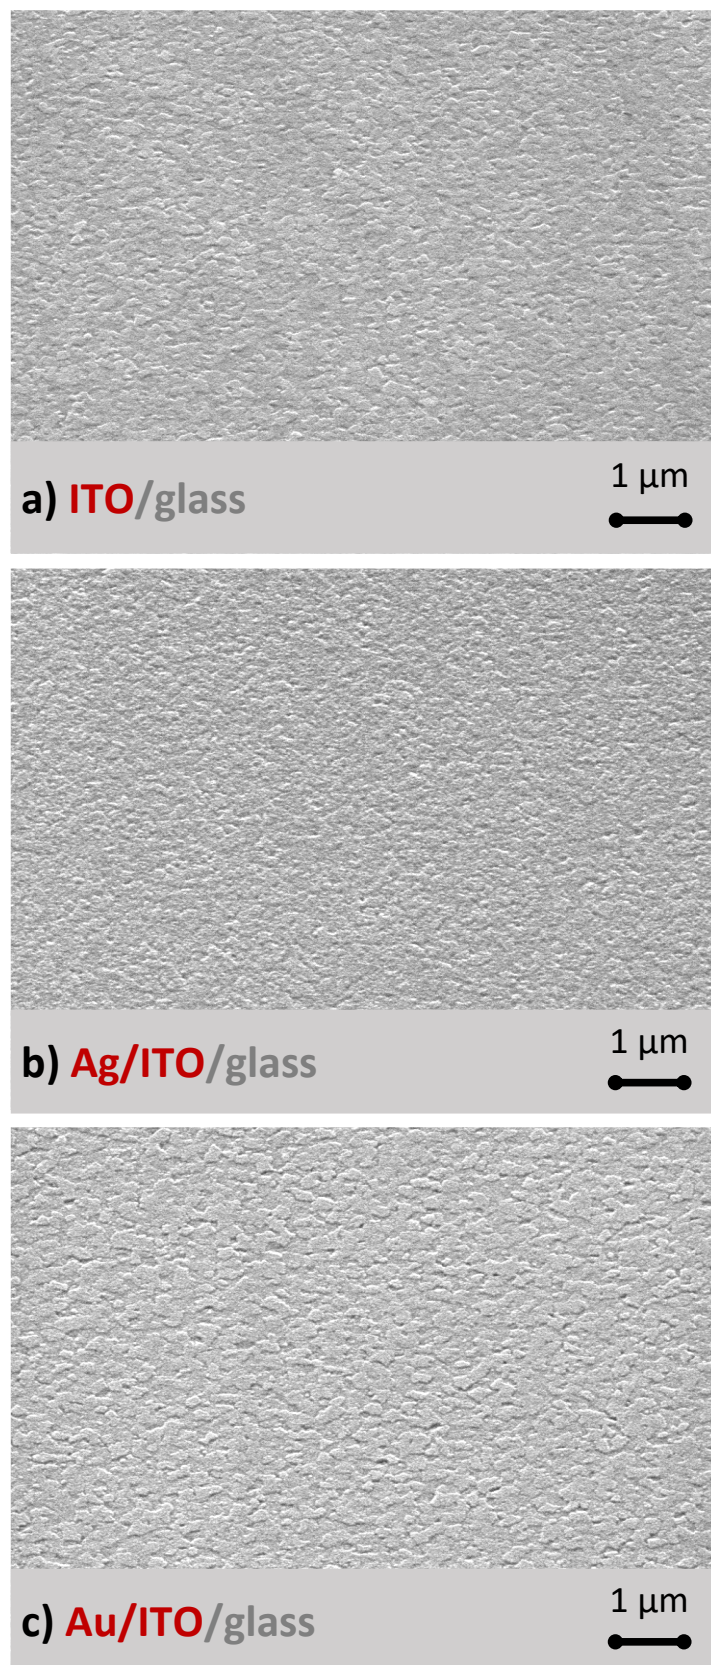

**Figure S5.** Morphology of the substrates: indium tin oxide (ITO)/glass surface (a); silver(Ag)/ITO/glass surface (b); gold(Au)/ITO/glass surface. Micrographs were acquired through high-resolution scanning electron microscopy (SEM) by using a secondary electron detector (SED). Lateral views at 45° were obtained with a magnification of 25000×.



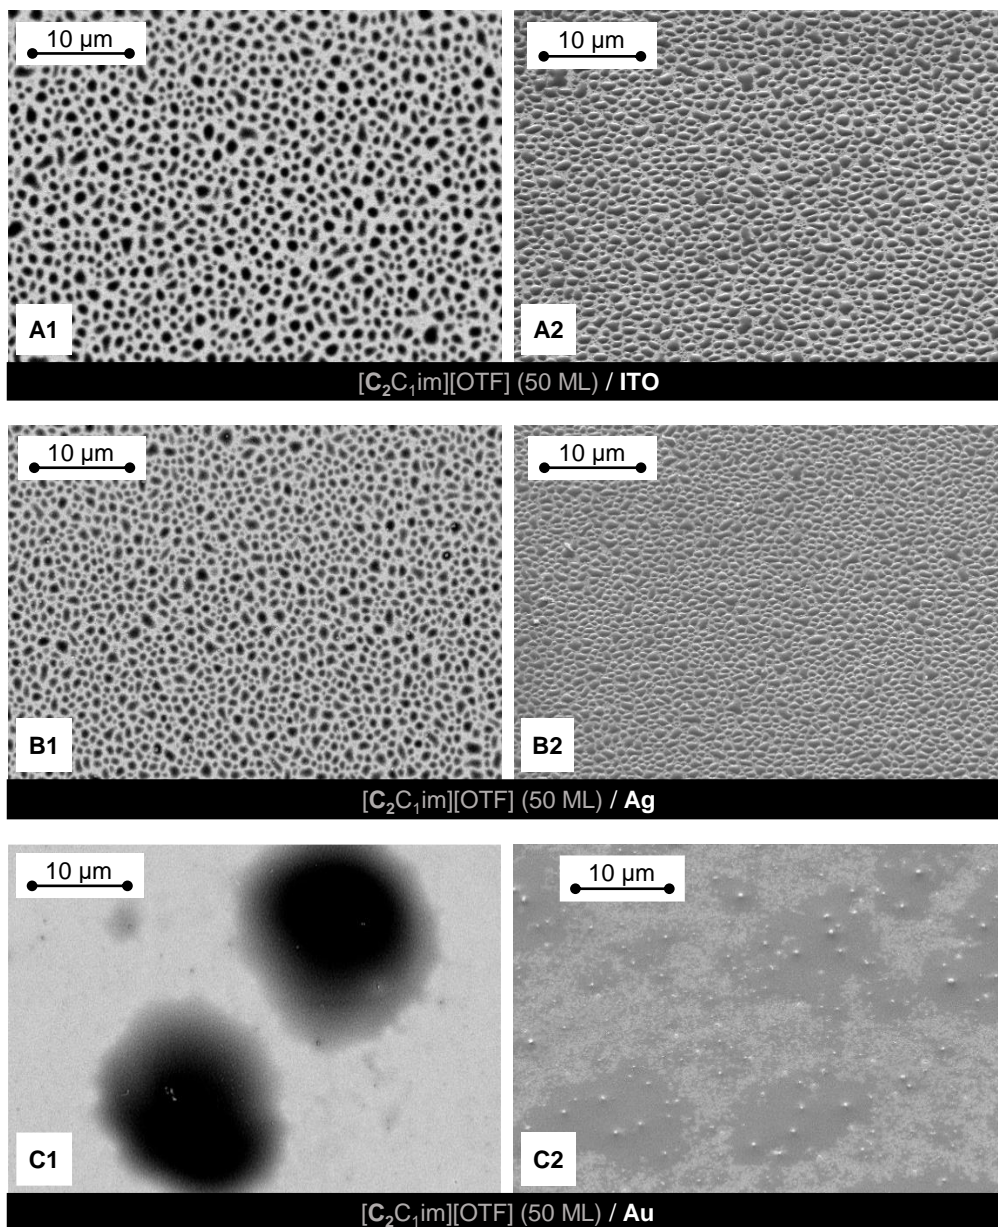

**Figure S6.** Micrographs acquired through high-resolution scanning electron microscopy of vapor-deposited  $[C_2C_{1im}][OTF]$  (50 monolayers, ML) onto surfaces of indium tin oxide (ITO)/glass (A1, A2), silver (Ag)/ITO (B1, B2), and gold(Au)/ITO (C1, C2). Top views (5000 $\times$ ) obtained by backscattered electron (A1, B1, C1) imaging, and lateral views at 45 $^\circ$  (5000 $\times$ ) obtained by secondary electron imaging (A2, B2, C2).

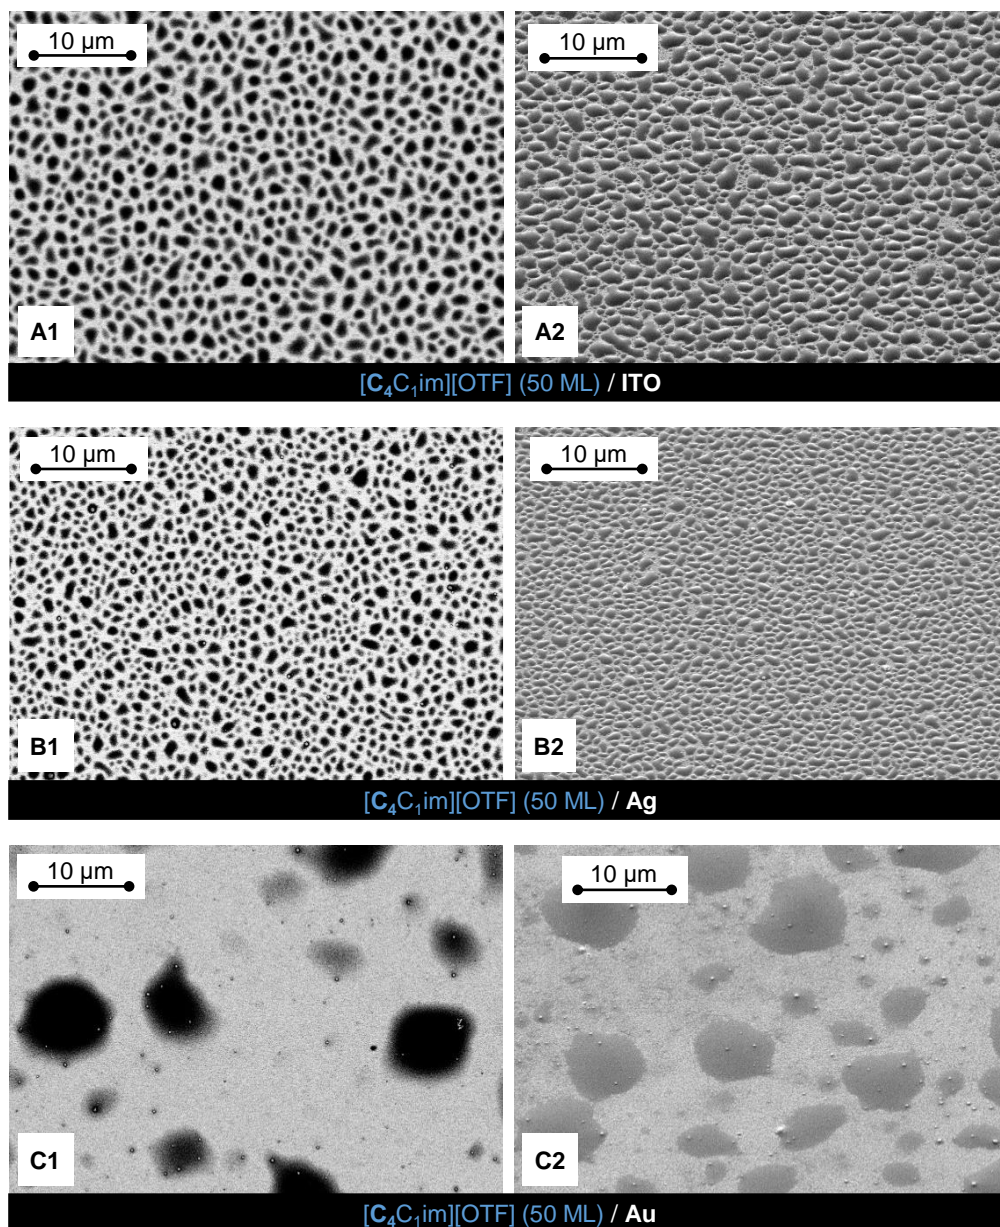

**Figure S7.** Micrographs acquired through high-resolution scanning electron microscopy of vapor-deposited  $[\text{C}_4\text{C}_{1\text{im}}][\text{OTF}]$  (50 monolayers, ML) onto surfaces of indium tin oxide (ITO)/glass (A1, A2), silver (Ag)/ITO (B1, B2), and gold(Au)/ITO (C1, C2). Top views (5000 $\times$ ) obtained by backscattered electron (A1, B1, C1) imaging, and lateral views at 45 $^\circ$  (5000 $\times$ ) obtained by secondary electron imaging (A2, B2, C2).



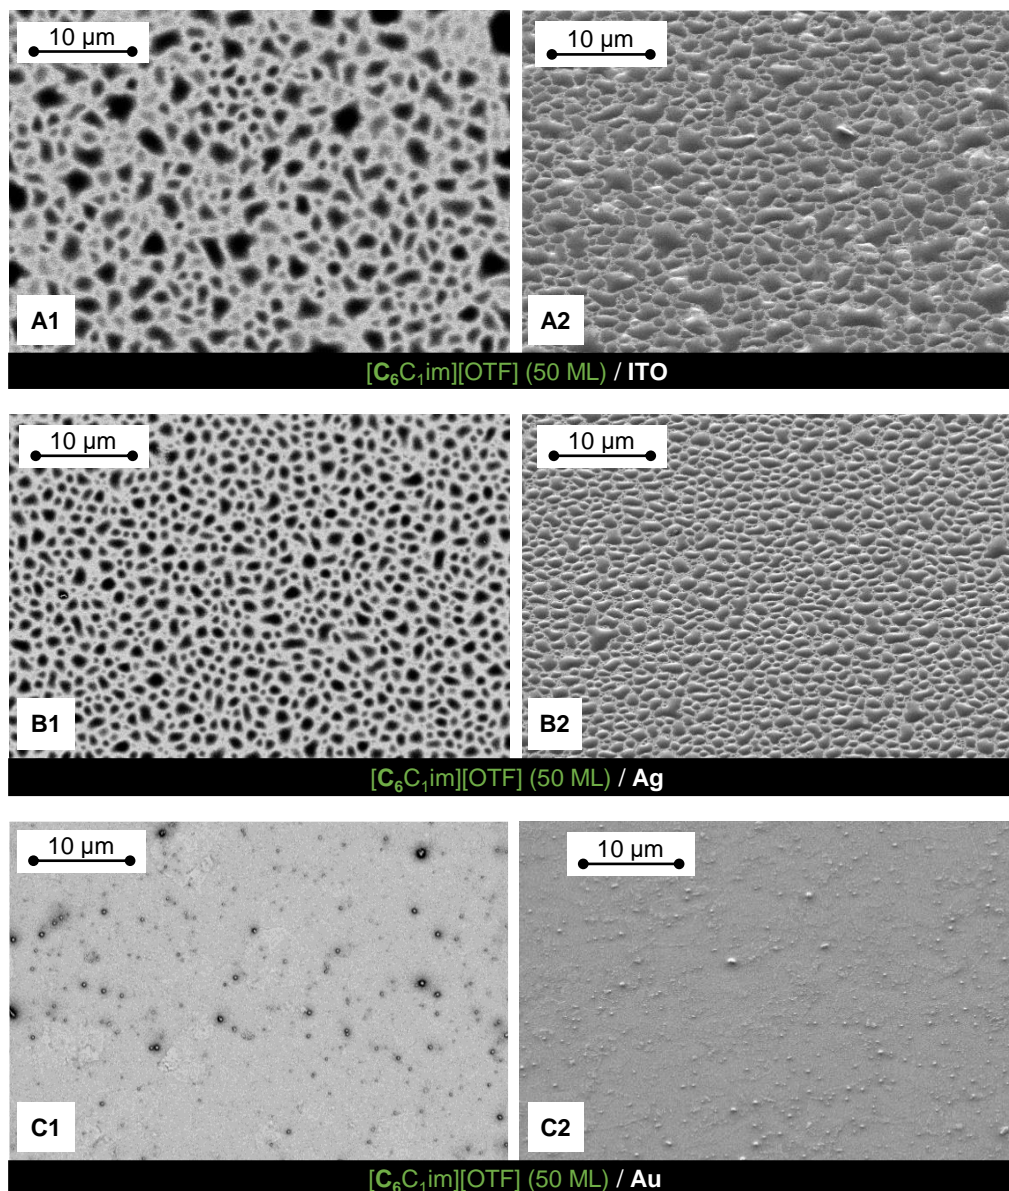

**Figure S8.** Micrographs acquired through high-resolution scanning electron microscopy of vapor-deposited  $[\text{C}_6\text{C}_{1\text{im}}][\text{OTF}]$  (50 monolayers, ML) onto surfaces of indium tin oxide (ITO)/glass (A1, A2), silver (Ag)/ITO (B1, B2), and gold(Au)/ITO (C1, C2). Top views (5000 $\times$ ) obtained by backscattered electron (A1, B1, C1) imaging, and lateral views at 45 $^\circ$  (5000 $\times$ ) obtained by secondary electron imaging (A2, B2, C2).



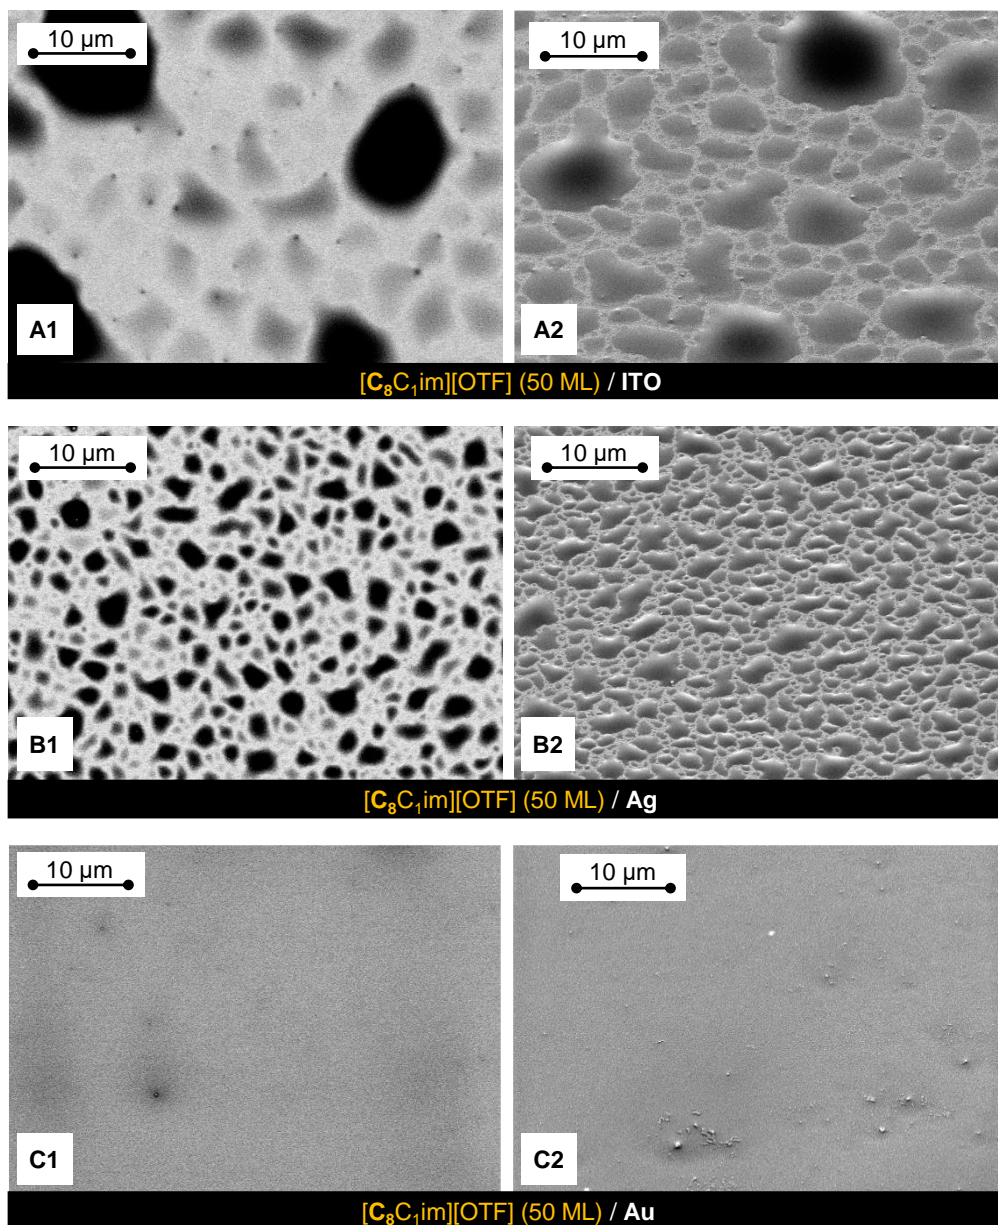

**Figure S9.** Micrographs acquired through high-resolution scanning electron microscopy of vapor-deposited  $[\text{C}_8\text{C}_{1\text{im}}][\text{OTF}]$  (50 monolayers, ML) onto surfaces of indium tin oxide (ITO)/glass (A1, A2), silver (Ag)/ITO (B1, B2), and gold(Au)/ITO (C1, C2). Top views (5000 $\times$ ) obtained by backscattered electron (A1, B1, C1) imaging, and lateral views at 45 $^\circ$  (5000 $\times$ ) obtained by secondary electron imaging (A2, B2, C2).

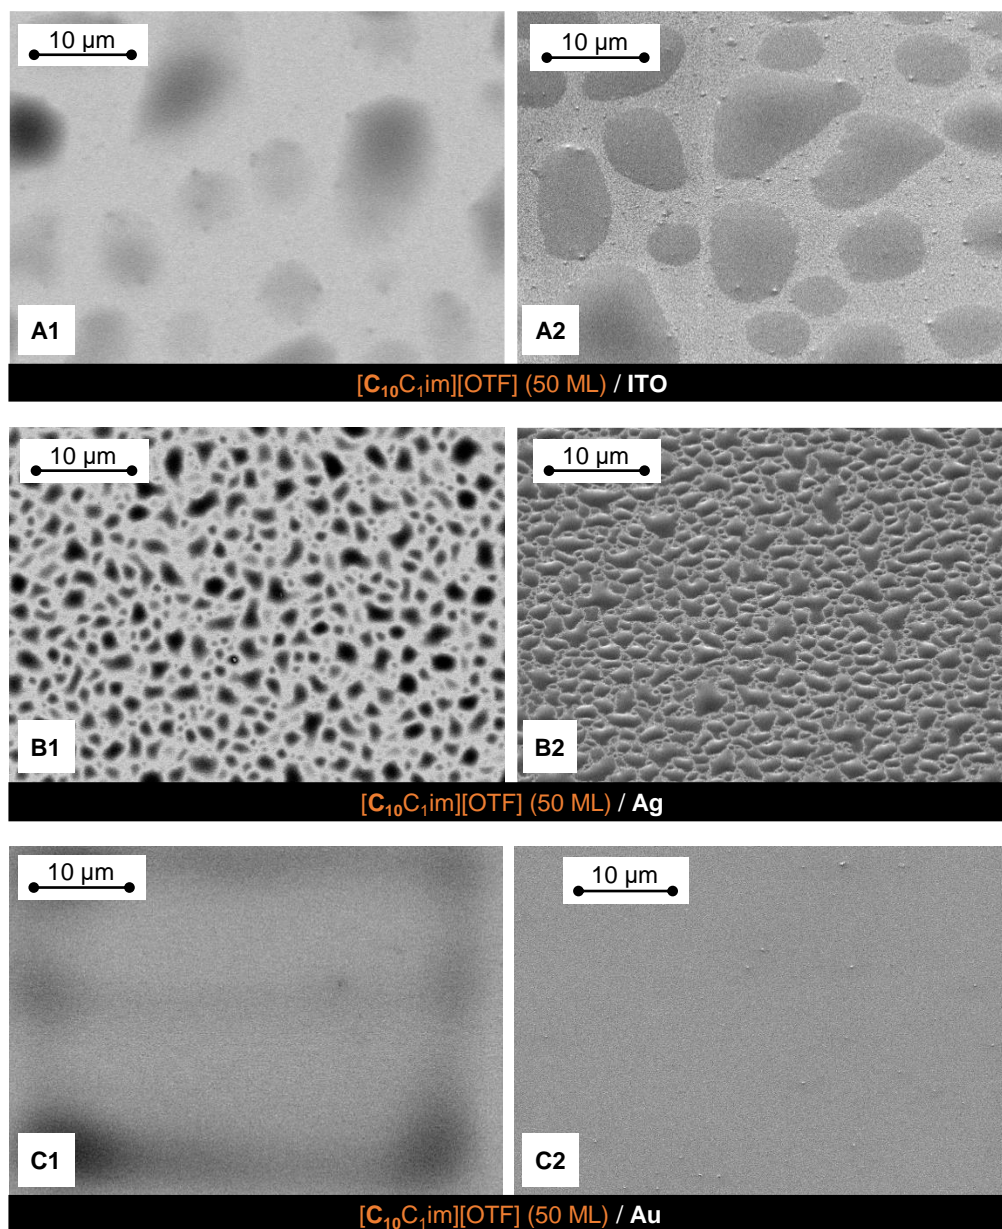

**Figure S10.** Micrographs acquired through high-resolution scanning electron microscopy of vapor-deposited  $[C_{10}C_{1im}][OTF]$  (50 monolayers, ML) onto surfaces of indium tin oxide (ITO)/glass (A1, A2), silver (Ag)/ITO (B1, B2), and gold(Au)/ITO (C1, C2). Top views (5000 $\times$ ) obtained by backscattered electron (A1, B1, C1) imaging, and lateral views at 45 $^\circ$  (5000 $\times$ ) obtained by secondary electron imaging (A2, B2, C2).

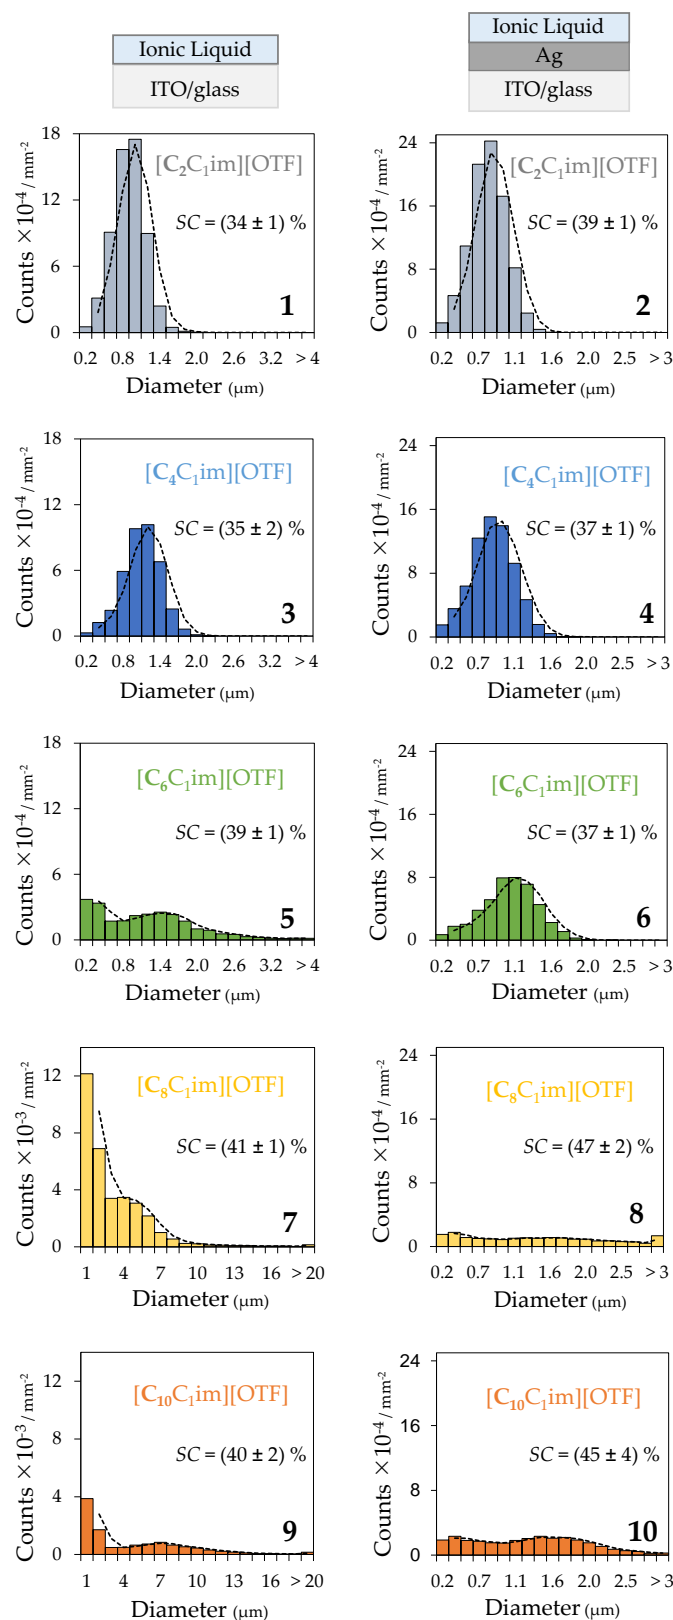

**Figure S11.** Droplet size distribution of vapor-deposited ionic liquids (50 monolayers, ML) onto ITO/glass (graphs on the left) and Ag/ITO/glass surfaces (graphs on the right): [C<sub>2</sub>C<sub>1</sub>im][OTF] (1,2); [C<sub>4</sub>C<sub>1</sub>im][OTF] (3,4); [C<sub>6</sub>C<sub>1</sub>im][OTF] (5,6); [C<sub>8</sub>C<sub>1</sub>im][OTF] (7,8); [C<sub>10</sub>C<sub>1</sub>im][OTF] (9,10). Values for the surface coverage (SC) are marked in each graph. The ionic liquids were deposited under the same experimental procedure and setup.

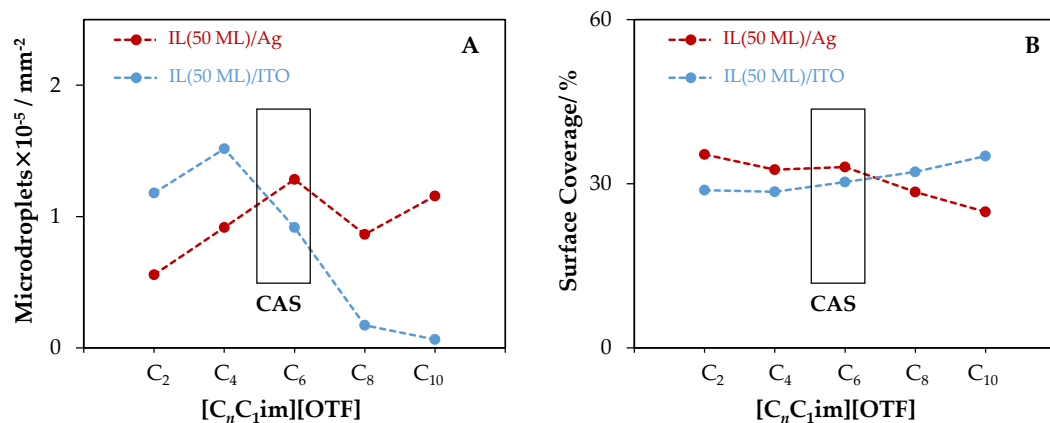

**Figure S12.** Schematic representation of the number of ionic liquid microdroplets (diameter above 1  $\mu\text{m}$ ) formed per  $\text{mm}^2$  of surface area (graph A) and the respective surface coverage of those microdroplets (graph B) as a function of each ionic liquid in the  $[\text{C}_n\text{C}_1\text{im}][\text{OTF}]$  series.



**Table S1.** Experimental conditions for the physical vapor deposition/thermal evaporation of each ionic liquid: effusion temperature ( $T_{\text{eff}}$ ); equilibrium vapor pressure ( $EVP$ ); mass flow rate at the Knudsen effusion cell orifice ( $\Phi$  (Knudsen cell)); mass flow rate at the substrate surface ( $\Phi$  (QCM)) and corresponding deposition rate in  $\text{\AA}\cdot\text{s}^{-1}$ ; geometric factor; deposition time; thin film thickness (nm and ML).

| Precursor                                                                                        | $T_{\text{eff}}$ | $EVP$         | $\Phi$<br>(Knudsen cell)                           | $\Phi$<br>(QCM)                                  | Geometric<br>factor        | Deposition<br>rate             | Deposition<br>time | Thickness |
|--------------------------------------------------------------------------------------------------|------------------|---------------|----------------------------------------------------|--------------------------------------------------|----------------------------|--------------------------------|--------------------|-----------|
|                                                                                                  | K                | Pa            | $\mu\text{g}\cdot\text{cm}^{-2}\cdot\text{s}^{-1}$ | $\text{ng}\cdot\text{cm}^{-2}\cdot\text{s}^{-1}$ |                            | $\text{\AA}\cdot\text{s}^{-1}$ | min                | ML        |
| <b>[C<sub>n</sub>C<sub>1</sub>im][OTf] (50 ML) / substrate</b>   substrates: Au/ITO; Ag/ITO; ITO |                  |               |                                                    |                                                  |                            |                                |                    |           |
| [C <sub>2</sub> C <sub>1</sub> im][OTf]                                                          | 513.2            |               |                                                    | $4.4 \pm 0.7$                                    |                            | $0.32 \pm 0.05$                | $\approx 18$       |           |
| [C <sub>4</sub> C <sub>1</sub> im][OTf]                                                          | 513.2            |               |                                                    | $3.4 \pm 0.7$                                    |                            | $0.26 \pm 0.05$                | $\approx 23$       |           |
| [C <sub>6</sub> C <sub>1</sub> im][OTf]                                                          | 513.2            | $\approx 0.1$ | $\approx 30$                                       | $4.1 \pm 0.6$                                    | $\approx 1 \times 10^{-4}$ | $0.33 \pm 0.05$                | $\approx 19$       | 50        |
| [C <sub>8</sub> C <sub>1</sub> im][OTf]                                                          | 523.2            |               |                                                    | $3.1 \pm 0.6$                                    |                            | $0.26 \pm 0.05$                | $\approx 25$       |           |
| [C <sub>10</sub> C <sub>1</sub> im][OTf]                                                         | 523.2            |               |                                                    | $3.5 \pm 0.6$                                    |                            | $0.30 \pm 0.05$                | $\approx 23$       |           |
